# Supplementary material
Source: publisher figshare collection journal article supplement (https://rs.figshare.com/ndownloader/files/27858789)
Supplement: Supplementary file 1 [file 27858789]

# Improving environment drives dynamical change in social game structure

**Authors:** Erika Chiba, Diane Carmeliza N. Cuaresma, Jomar F. Rabajante, Jerrold M.

Tubay, Maica Krizna Areja Gavina, Tatsuki Yamamoto, Jin Yoshimura, Satoru Morita,

Hiromu Ito and Takuya Okabe

## Supplementary Materials

### Supplementary Text

In the main text, we adopted a simple form  $p(E, n_c) = E^{\delta^{n_c-1}}$  for the success probability. In order to show that the results are robust and general, here we present the corresponding results for another functional forms. The necessary conditions for the success probability  $p(E, n_c)$  are as follows: it is a monotonically increasing function of the number of cooperators  $n_c$  and environmental value  $E$ , and moreover  $p(0, n_c) = 0$  and  $p(1, n_c) = 1$ .

## Model S1

As in the main text, we assume an exponential function of  $E$ ,

$$p(E, n_c) = E^\epsilon.$$

According to the above conditions, the exponent  $\epsilon$  should be a decreasing function of  $n_c$ . Let it vary between  $1/\delta$  and  $\delta$ , where  $\delta$  is an arbitrary small number ( $0 \leq \delta \leq 1$ ). In other words, the smaller  $\delta$  is, the stronger the  $n_c$  dependence of  $p(E, n_c)$ .

For instance, we may write

$$\epsilon = \frac{1}{x + \frac{1}{x + \frac{1}{\delta} - \delta}} + \delta,$$

where

$$x = \tan\left(\frac{\pi n_c}{4}\right)$$

is an increasing function of  $n_c$ . Note that  $\epsilon$  varies from  $1/\delta$  to  $\delta$  as  $n_c$  changes from 0 to 2. First, we assume  $\delta = 1/3$  for figures S1 and S2. In figure S1a, the probability  $p(E, n_c)$  is plotted against  $n_c$  for  $E = 0, 0.25, 0.5$  and  $0.75$ . In figure S1b, the probabilities for  $n_c = 0, 1$  and  $2$  are shown on a line of unit length for  $E = 0, 0.25, 0.5, 0.75$  and  $1$ . This figure S1 should be compared with figure 2 in the main text. Figure S2a and b show the trajectories in the  $\Delta p_1$ - $\Delta p_2$  plane for  $c/b = 1/2$  and  $1/3$ , respectively. Figure S2c shows the trajectories in the  $E$ - $c/b$  plane for  $c/b = 1/2$  (solid arrows) and  $1/3$  (dashed arrows). The figure S2 should be compared with figure 3 in the main text. It is remarked that the course of change in game structure is

essentially the same. Similarly, the panels in figures S3 and S4 are drawn for  $\delta = 1/5$ .

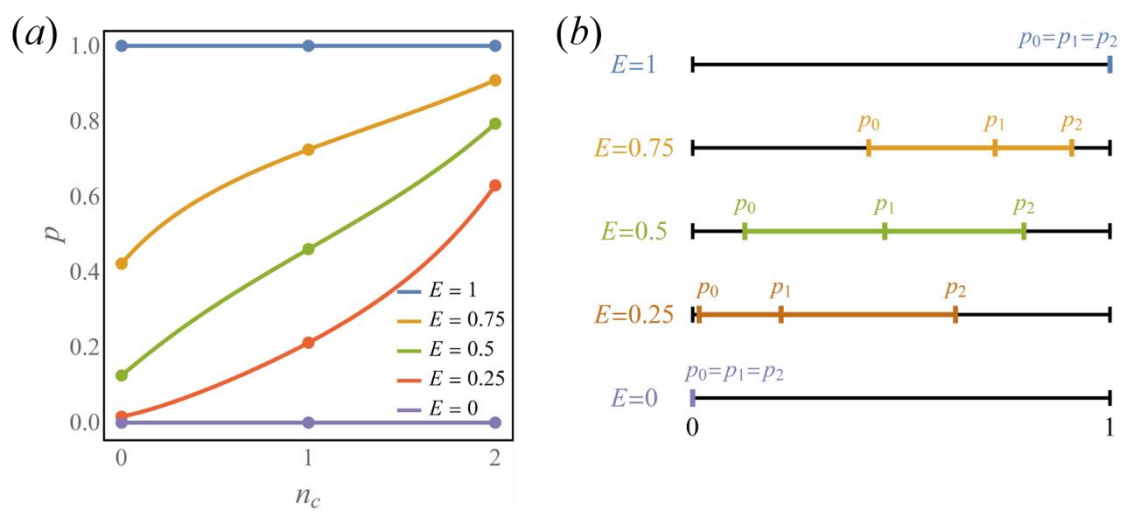

Figure S1

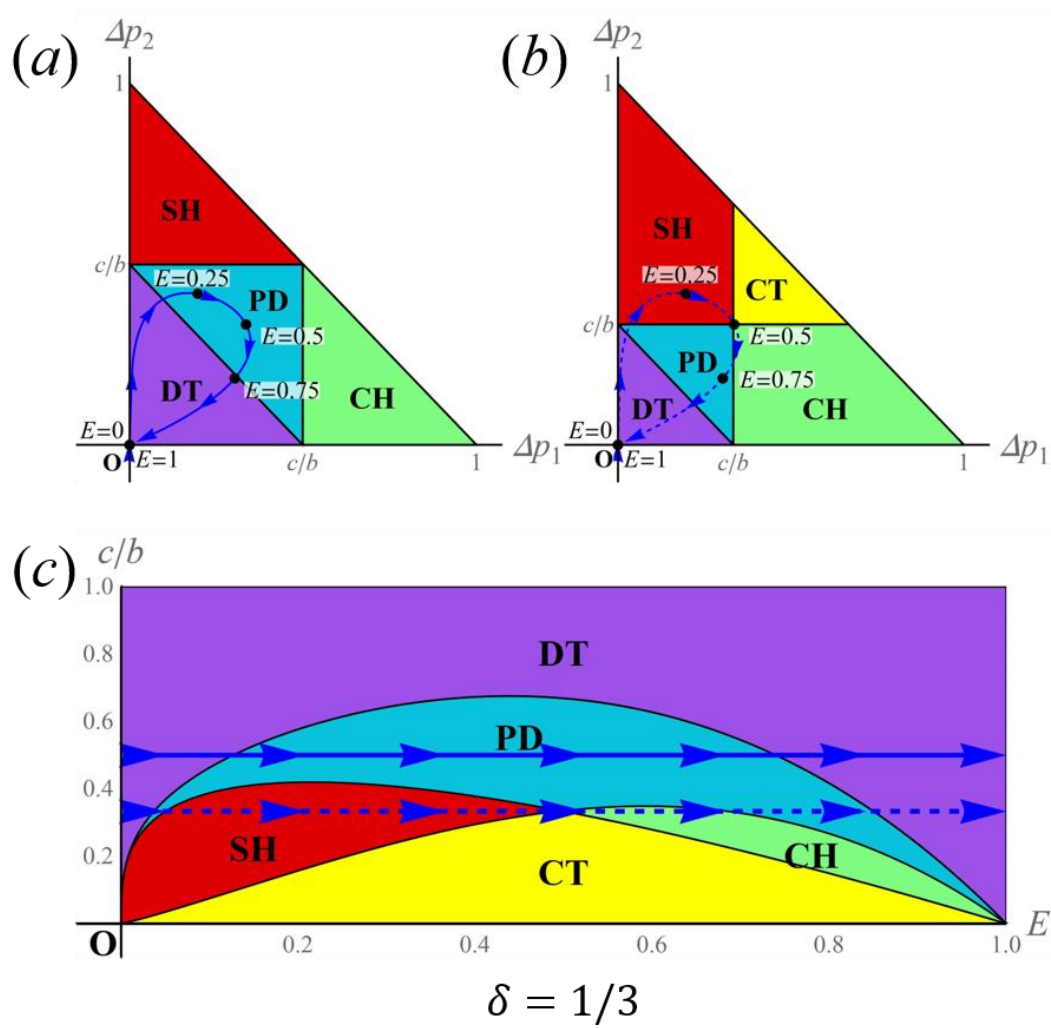

Figure S2

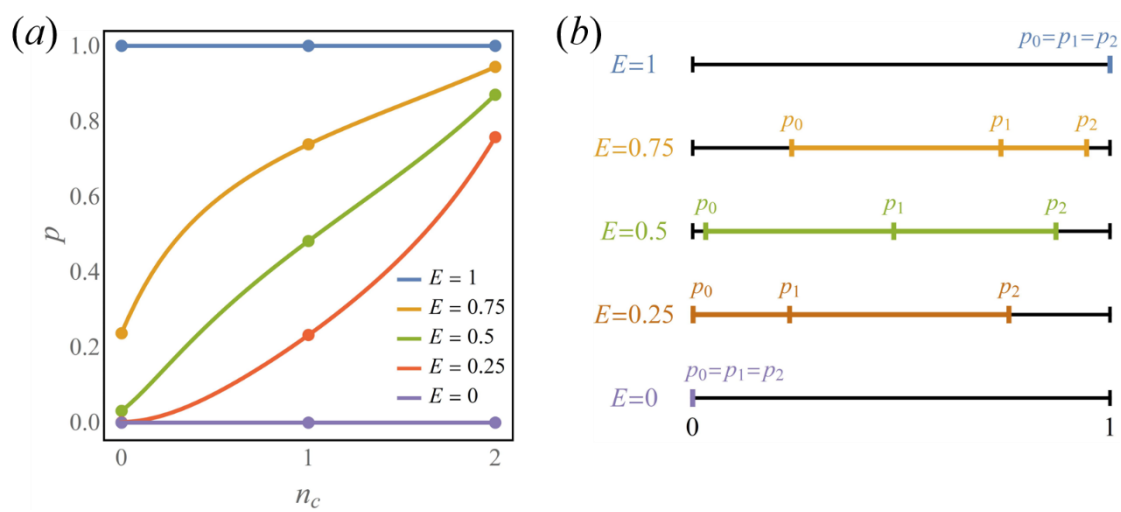

Figure S3

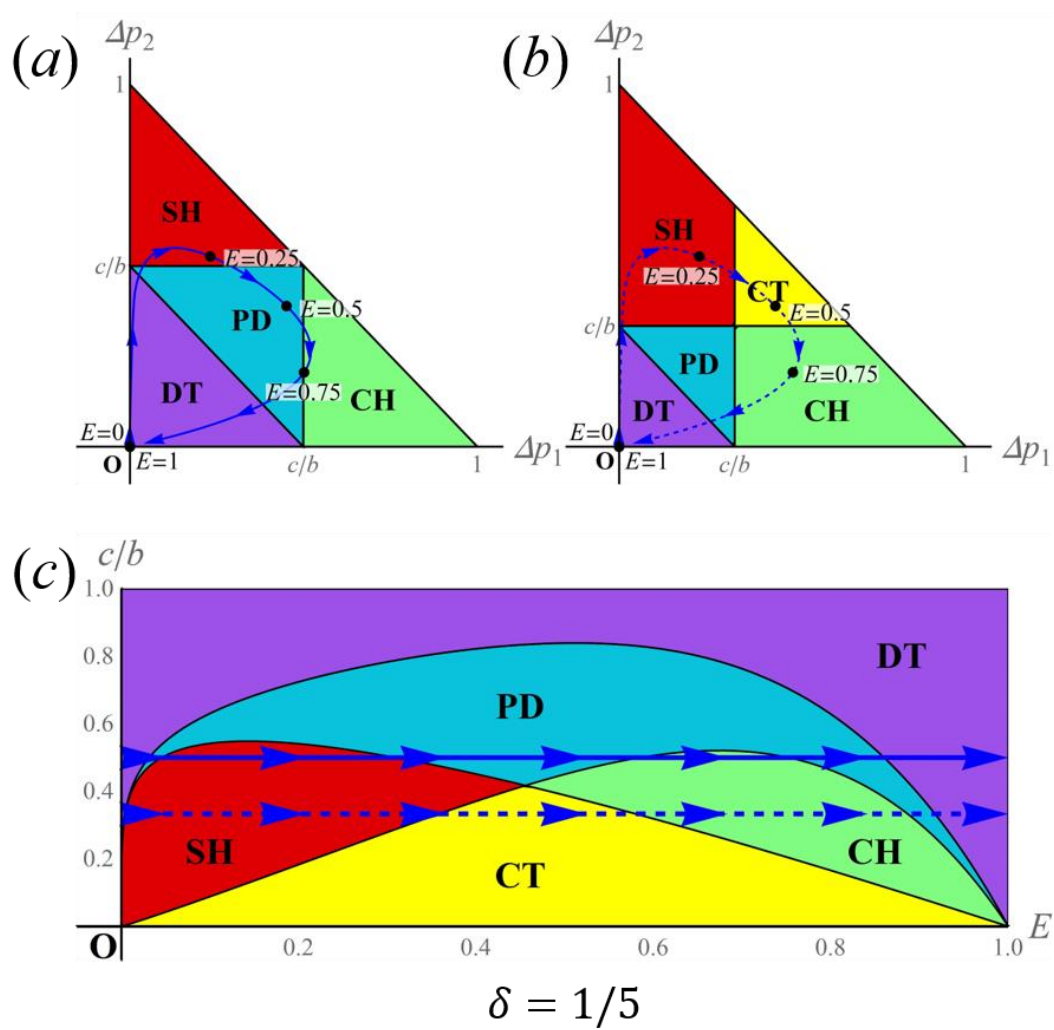

Figure S4

## Model S2

As another example, let us use

$$p(E, n_c) = \sqrt{E} \left( \frac{1 + n_c}{3} \right)^{2(1-E)}.$$

In figure S5a, the probability  $p(E, n_c)$  is plotted against  $n_c$  for  $E = 0, 0.25, 0.5$  and  $0.75$ . In figure S5b, the values of  $p(E, n_c)$  for  $n_c = 0, 1$  and  $2$  are shown on a line of unit length for  $E = 0, 0.25, 0.5, 0.75$  and  $1$ .

Figures S6a and b show the trajectories in the  $\Delta p_1$ - $\Delta p_2$  plane for  $c/b = 1/3$  and  $1/5$ , respectively. Figure S6c shows the trajectories in the  $E$ - $c/b$  plane for  $c/b = 1/3$  (solid arrows) and  $1/5$  (dashed arrows).

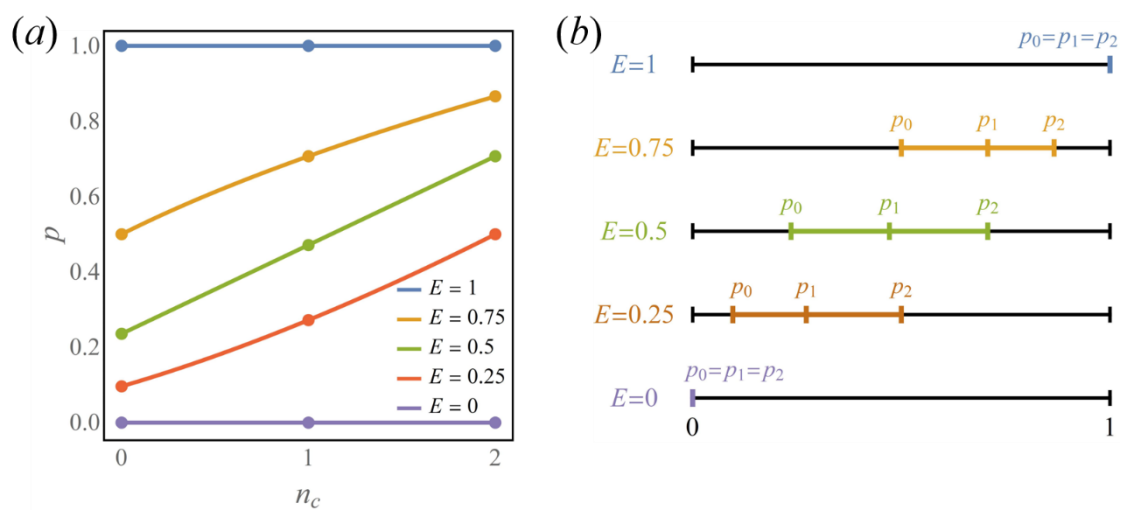

Figure S5

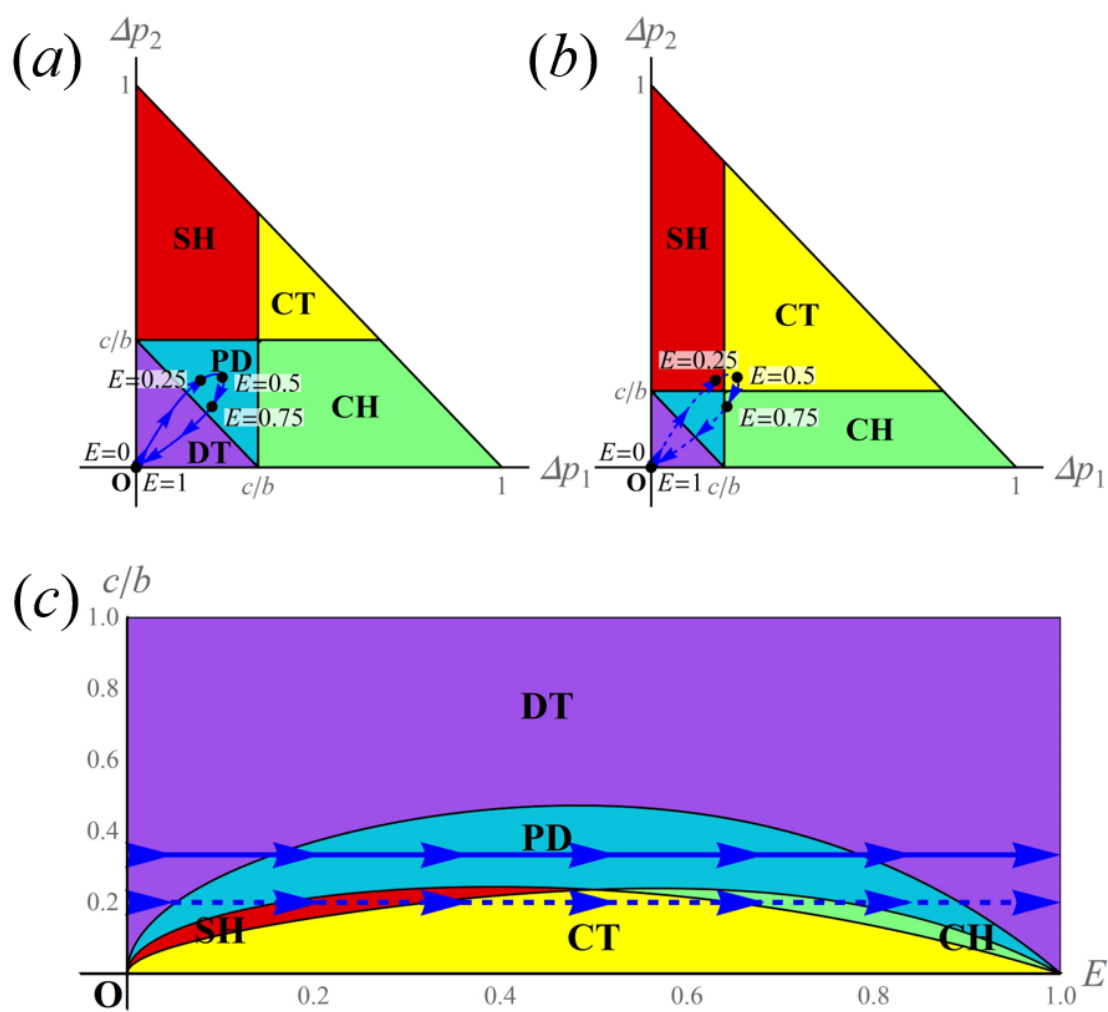

Figure S6
